# Supplementary material
Source: PubMed Central journal article supplement (PMC2993879)
Supplement: NIHMS247750-supplement-Supplementary_data.pdf [file NIHMS247750-supplement-Supplementary_data.pdf]

## SUPPLEMENTARY MATERIALS:

**Supplementary table 1:** Strains and plasmids used in this study

| Strain or plasmid       | Genotype and antibiotic resistance phenotype                                                                                                                                                                                                   | Reference or source  |
|-------------------------|------------------------------------------------------------------------------------------------------------------------------------------------------------------------------------------------------------------------------------------------|----------------------|
| <i>E. coli</i> strains  |                                                                                                                                                                                                                                                |                      |
| Top10                   | F- <i>mcrA</i> $\Delta$ ( <i>mrr-hsdRMS-mcrBC</i> ) $\Phi$ 80 <i>lacZ</i> $\Delta$ M15<br><i><math>\Delta</math>lacX74 recA1 ara <math>\Delta</math>139 <math>\Delta</math>(ara-leu)7697 galU galK</i><br><i>rpsL</i> (StrR) <i>endA1 nupG</i> | Invitrogen           |
| BL21 (DE3)              | F- <i>ompT gal [dcm] [lon] hsdSB (rB- mB-)</i> DE3                                                                                                                                                                                             | Studier et al., 1990 |
| BL21 gold (DE3)         | F- <i>ompT gal [dcm] [lon] hsdSB (rB- mB-)</i> Tetr<br>DE3 <i>endA lacZ Hte.</i>                                                                                                                                                               | Stratagene           |
| <i>E. coli</i> plasmids |                                                                                                                                                                                                                                                |                      |
| pET101/103              | CarbR                                                                                                                                                                                                                                          | Invitrogen           |
| pET-vjbR                | VjbR fused to a 6x Histidine tag at C-terminus                                                                                                                                                                                                 | This Study           |
| pET-gntR4               | GntR4 fused to a 6x Histidine tag at C-terminus                                                                                                                                                                                                | This Study           |
| pET-araC8               | AraC8 fused to a 6x Histidine tag at C-terminus                                                                                                                                                                                                | This Study           |
| pET-arsR6               | ArsR6 fused to a 6x Histidine tag at C-terminus                                                                                                                                                                                                | This Study           |
| pET-deoR1               | DeoR1 fused to a 6x Histidine tag at C-terminus                                                                                                                                                                                                | This Study           |
| pSURS1                  | A fusion between pSU19 and pRS528 plasmids<br>containing <i>lacZYA</i> and P15A ori for promoter<br>expression analysis. CmR                                                                                                                   | This Study           |
| pSURS2                  | 463 bp fragment upstream of <i>virB1</i> cloned in<br>BamHI/EcoRI sites of pSURS1                                                                                                                                                              | This Study           |
| pSURS2b                 | 463 bp fragment upstream of <i>virB1</i> cloned in<br>BamHI/EcoRI sites of pSURS1 containing HindIII<br>site at <i>virB</i> promoter box                                                                                                       | This Study           |
| pSURS7                  | <i>Pvjbr</i> 333 bp upstream of <i>vjbR</i> (BAB2_0118)                                                                                                                                                                                        | This Study           |
| pSURS7b                 | <i>PtetR-vjbr</i> 473 bp upstream of <i>tetR</i> (BAB2_0117)                                                                                                                                                                                   | This Study           |
| pSURS13r                | 323 bp fragment upstream of BAB2_0762                                                                                                                                                                                                          | This Study           |
| pSURS14                 | 317 bp fragment upstream of BAB2_1069<br>(BRA1111)                                                                                                                                                                                             | This Study           |
| pSURS17f                | 183 bp fragment upstream of BAB1_1881                                                                                                                                                                                                          | This Study           |
| pSURS18f                | 147 bp fragment upstream of BAB2_0328                                                                                                                                                                                                          | This Study           |

|          |                                                       |            |
|----------|-------------------------------------------------------|------------|
| pSURS18r | 147 bp fragment upstream of BAB2_0329                 | This Study |
| pSURS19  | 175 bp fragment upstream of BAB1_1651                 | This Study |
| pSURS21  | 790 bp fragment upstream of BAB1_0108                 | This Study |
| pSURS22  | 320 bp fragment upstream of BR0951 ( <i>B. suis</i> ) | This Study |
| pSURS23  | 449 bp fragment upstream of BAB1_1066                 | This Study |
| pSURS25  | 375 bp fragment upstream of BAB1_1837                 | This Study |
| pSURS29  | 290 bp fragment upstream of BAB1_1994                 | This Study |
| pSURS30  | 637 bp fragment upstream of BAB2_1106                 | This Study |
| pSURS31  | 399 bp fragment upstream of BAB1_1058                 | This Study |
| pSURS32  | 432 bp fragment upstream of BAB1_0604                 | This Study |
| pSURS35  | 704 bp fragment upstream of BAB2_0403                 | This Study |
| pWIL1    | pCR2.1 containing 123 bp fragment of <i>PvirB</i>     | This Study |

*B. abortus* strains

|       |                                    |                          |
|-------|------------------------------------|--------------------------|
| 2308  | Wild type                          | Deyoe                    |
| ADH3  | $\Delta virB2$ (non polar) in 2308 | Den Hartigh et al., 2004 |
| ADH17 | $\Delta vjBR::kan$ in 2308         | This Study               |
| MDJ15 | pFT/BAB1_1652 in 2308              | This Study               |
| MDJ16 | pFT/BAB1_1652 in ADH3              | This Study               |
| MDJ11 | pFT/BR1038(303-410) in 2308        | This Study               |
| MDJ12 | pFT/BR1038(303-410) in ADH3        | This Study               |
| MDJ42 | pFT/BR1038(303-390) in 2308        | This Study               |
| MDJ43 | pFT/BR1038(303-390) in ADH3        | This Study               |
| MDJ24 | pFT/BAB1_1058(303-418) in 2308     | This Study               |
| MDJ26 | pFT/BAB1_1058(303-418) in ADH3     | This Study               |
| MDJ40 | pFT/BAB1_1058(303-398) in 2308     | This Study               |
| MDJ41 | pFT/BAB1_1058(303-398) in ADH3     | This Study               |
| MDJ44 | pFT/BAB1_1058(303-369) in 2308     | This Study               |
| MDJ45 | pFT/BAB1_1058(303-369) in ADH3     | This Study               |
| MDJ50 | pFT/BAB2_0403 in 2308              | This Study               |
| MDJ51 | pFT/BAB2_0403 in ADH3              | This Study               |
| ADH58 | <i>PvirB1::lacZ</i> in 2308        | This Study               |
| ADH60 | <i>PvirB1::lacZ</i> in ADH17       | This Study               |
| MDJ30 | <i>PvceC::lacZ</i> in 2308         | This Study               |
| MDJ31 | <i>PvceC::lacZ</i> in ADH17        | This Study               |

*L. pneumophila* strains

|      |             |                         |
|------|-------------|-------------------------|
| Lp01 | Wild type   | Berger and Isberg, 1993 |
|      | DotA mutant |                         |

*B. abortus* or *L. pneumophila* plasmids

|                  |                                                                        |                         |
|------------------|------------------------------------------------------------------------|-------------------------|
| pFLAGTEM1        | $\beta$ -lactamase reporter cloning vector                             | Raffatellu et al., 2005 |
| pFT/GST          | pFLAGTEM1 expressing FT::GST                                           | This Study              |
| pFT/BAB1_1652    | pFLAGTEM1 expressing TEM1::BAB1_1652                                   | This Study              |
| pFT/BAB2_0056    | pFLAGTEM1 expressing TEM1::BAB2_0056                                   | This Study              |
| pFT/BAB2_0095    | pFLAGTEM1 expressing TEM1::BAB2_0095                                   | This Study              |
| pFT/BAB1_0604    | pFLAGTEM1 expressing TEM1::BAB1_0604                                   | This Study              |
| pFT/BR1038wt     | pFLAGTEM1 expressing TEM1::BR1038(303-410)                             | This Study              |
| pFT/BR1038-20    | pFLAGTEM1 expressing TEM1::BR1038(303-390)                             | This Study              |
| pFT/BAB1_1058wt  | pFLAGTEM1 expressing TEM1::BAB1_1058(303-418)                          | This Study              |
| pFT/BAB1_1058-20 | pFLAGTEM1 expressing TEM1::BAB1_1058(303-398)                          | This Study              |
| pFT/BAB1_1058-49 | pFLAGTEM1 expressing TEM1::BAB1_1058(303-369)                          | This Study              |
| pFT/BAB2_0403    | pFLAGTEM1 expressing TEM1::BAB2_0403                                   | This study              |
| pFT/BAB1_1705    | pFLAGTEM1 expressing TEM1::BAB1_1705                                   | This study              |
| pFT/BAB1_0119    | pFLAGTEM1 expressing TEM1::BAB1_0119                                   | This study              |
| pFT/BAB1_1674    | pFLAGTEM1 expressing TEM1::BAB1_1674                                   | This study              |
| pFT/BAB1_0939    | pFLAGTEM1 expressing TEM1::BAB1_0939                                   | This study              |
| pFT/BAB1_0339    | pFLAGTEM1 expressing TEM1::BAB1_0339                                   | This study              |
| pFT/BAB1_0651    | pFLAGTEM1 expressing TEM1::BAB1_0651                                   | This study              |
| pFT/BAB1_0740    | pFLAGTEM1 expressing TEM1::BAB1_0740                                   | This study              |
| pVjbR-F          | up- and downstream fragments of <i>vjbR</i> separated by KIXX cassette | This study              |
| pFT/RalF         | pFlagTEM1 expressing FT::RalF                                          | This Study              |
| pFT/RalF K368A   | pFlagTEM1 expressing FT::RalF(K368A)                                   | This Study              |
| pFT/RalF L372T   | pFlagTEM1 expressing FT::RalF(L372T)                                   | This Study              |
| pFT/RalFc        | pFlagTEM1 expressing FT::RalF(350-374)                                 | This Study              |
| pTFT/RalFc       | In pFT/RalFc expressing FT::RalF(350-374) and DsRed                    | This Study              |

**Supplementary Table 2.** *Brucella* spp. containing predicted consensus sequence in promoter

| <i>B. abortus</i><br>2308 ORF                                                           | <i>B. suis</i><br>1330<br>ORF | <i>B. melitensis</i><br>16M ORF | <i>virB</i> promoter box | Gene name/Predicted function                                      | Downstream genes<br>possibly in operon |
|-----------------------------------------------------------------------------------------|-------------------------------|---------------------------------|--------------------------|-------------------------------------------------------------------|----------------------------------------|
| <u>Amino acid biosynthesis</u>                                                          |                               |                                 |                          |                                                                   |                                        |
| BAB1_0926                                                                               | BR0908                        | BMEI1061                        | ATTAGAGGGTTTCGGCTT       | aroQ                                                              | BAB1_0925-BAB1_0923                    |
| BAB1_1031                                                                               | BR1013                        | BMEI0971                        | ATCAGCGCGACCACGCAT       | Aminoacyl-tRNA synthetase                                         | BAB1_1030-BAB1_1034                    |
| BAB1_0335                                                                               | BR0305                        | BMEI1617                        | AACAGGCATAAAGAAAAC       | metZ                                                              | BAB1_0334                              |
| BAB1_0813                                                                               | BR0793                        | BMEI1166                        | ATCAGTCAATAAGCACTT       | O-acetylhomoserine/O-acetylserine<br>sulfhydrylase family protein | -                                      |
| BAB2_0751                                                                               | BRA0486                       | BMEI10781                       | CTCCCCGAAAGGGAGGAT       | homoserine O-succinyltransferase                                  | -                                      |
| BAB1_2087                                                                               | BR2086                        | BMEI2040                        | ATGCTCTAAAAAGATACC       | hisE                                                              | BAB1_2088                              |
| <u>Biosynthesis of cofactors, prosthetic groups, and carriers</u>                       |                               |                                 |                          |                                                                   |                                        |
| BAB1_1161                                                                               | BR1138                        | BMEI0846                        | ATGAGCCAGTCAGGGGAT       | triosephosphate isomerase, tpiA-1                                 | BAB1_1161-BAB1_1148                    |
| BAB1_0972                                                                               | BR0957                        | BMEI1020                        | ATGATCTATCTCGCAACC       | mobA                                                              | BAB1_0971-BAB1_0968                    |
| BAB1_1719                                                                               | BR1707                        | BMEI0329                        | ATGCCCGAATTCGATCAT       | thiamine-phosphate<br>pyrophosphorylase (putative)                | BAB1_1720-BAB1_1726                    |
| <u>Cell envelope: Biosynthesis and degradation of murein sacculus and peptidoglycan</u> |                               |                                 |                          |                                                                   |                                        |
| BAB1_0607                                                                               | BR0583                        | BMEI1351                        | ATGAGGCAAATCTCGCCT       | penicillin binding protein                                        | BAB1_0606-BAB1_0604                    |
| BAB2_0312                                                                               | BRA0923                       | BMEI10374                       | AAGAGCGCGGGCGCTGAT       | alanine racemase                                                  | BAB2_0311                              |

|                                                                                           |         |          |                     |                                   |                     |
|-------------------------------------------------------------------------------------------|---------|----------|---------------------|-----------------------------------|---------------------|
| BAB2_0781                                                                                 | BRA0455 | BMEI0811 | AACCTCGATCCAGAAGCT  | membrane protein                  | BAB2_0782           |
| <u>Cellular processes: Adaptations to atypical conditions/Pathogenesis/Detoxification</u> |         |          |                     |                                   |                     |
| BAB1_0672                                                                                 | BR0652  | BMEI1296 | ATGGCCGATATCTCTGTA  | RelA/SpoT protein                 | BAB1_0673-BAB1_0675 |
| BAB1_2150                                                                                 | BR2149  | BMEI1980 | GATCGCCATTTGCCGGAT  | Dps family protein                | -                   |
| BAB2_1106                                                                                 | BRA1147 | BMEI0150 | ATGCTTAAGGTGGAAATT  | flagellin family protein          | -                   |
| BAB1_1030                                                                                 | BR1012  | BMEI0972 | AACCTCTCGATAACGCTT  | glutathione reductase             | BAB1_1031-BAB1_1034 |
| BAB1_1441                                                                                 | BR1422  | BMEI0587 | ATTTCGATGGATGGAGCAT | competence protein ComL, putative | BAB1_1440-BAB1_1438 |
| BAB1_1880                                                                                 | BR1878  | BMEI0183 | GTCTTCCAGATAAAGGTT  | competence protein F              | BAB1_1879-BAB1_1876 |
| -                                                                                         | BR0971  | BMEI1007 | GGCCGCTTTTTTACTGTT  | omp                               |                     |
| -                                                                                         | BRA0173 | BMEI1069 | ATCCGGCATATCTCTCAC  | omp                               |                     |
| BAB1_0108                                                                                 | BR0111  | BMEI1837 | ATCCGTGATCTCGCAGCT  | cyclic beta 1-2 glucan synthetase | BAB1_0109           |
| BAB2_0067                                                                                 | BRA0068 | BMEI0026 | ATGCTCCAGATCGCAGAT  | virB2                             | BAB2_0066-BAB2_0057 |
| BAB2_0068                                                                                 | BRA0069 | BMEI0025 | ATGACCGATATCGCTGAT  | virB1                             | BAB2_0067-BAB2_0057 |
| BAB1_0402                                                                                 | BR0372  | BMEI1553 | ATCCTGCATATCTATGCC  | bacA                              | -                   |
| BAB1_0801                                                                                 | BR0780  | -        | AACCTCCATGCCCTGAT   | sugE protein                      | -                   |
| BAB2_0205                                                                                 | BRA0211 | BMEI1033 | TGCAGCCATATCTTGTTT  | pmbA                              | BAB2_0206-BAB2_0210 |

Central intermediary metabolism

|           |         |          |                    |                                               |                     |
|-----------|---------|----------|--------------------|-----------------------------------------------|---------------------|
| BAB1_1837 | BR1829  | BMEI0222 | ATGCGCCATGCCGAACAT | carbonic anhydrase, putative                  | -                   |
| BAB2_0253 | BRA0981 | BMEI0316 | ATGGTTCAAATGGCAAAT | 2-deoxy-d-gluconate 3-dehydrogenase, putative | BAB2_0253-BAB2_0263 |

DNA metabolism: DNA replication, recombination, and repair

|           |         |          |                    |                              |           |
|-----------|---------|----------|--------------------|------------------------------|-----------|
| BAB1_1224 | BR1202  | BMEI0787 | ATTTTCGGAATTGCTGAT | recA                         | BAB1_1223 |
| BAB2_0625 | BRA0615 | BMEI0656 | AGGGCCGCTATAGCCGAT | UMUC-like DNA-repair protein | BAB2_0624 |

Energy metabolism: Amino acids and amines

|           |         |          |                    |                                       |                            |
|-----------|---------|----------|--------------------|---------------------------------------|----------------------------|
| BAB2_0513 | BRA0727 | BMEI0559 | ATGCGTTAAAGCGCGCCT | glycine cleavage system protein       | BAB2_0514-BAB2_0516        |
| BAB1_1806 | BR1798  | BMEI0252 | GGTATCCATTTTCGGGAT | ATP synthase                          | BAB1_1807 and<br>BAB1_1804 |
| -         | BR0202  | BMEI1747 | ATGTGCGGGATGACTCTT | aldehyde dehydrogenase family protein | -                          |
| BAB2_0835 | BRA0386 | BMEI0880 | ATGCTTCAAATAGAAGAG | acetate kinase                        | BAB2_0836                  |
| BAB2_0459 | BRA0779 | BMEI0512 | ATGCTGCAACTGGCAGAC | 6-phosphogluconolactonase             | BAB2_0458                  |
| BAB2_0460 | BRA0778 | BMEI0513 | ATGTGTGCATTTGCGGTT | glucose-6-phosphate 1-dehydrogenase   | BAB2_0459-BAB2_0458        |
| BAB2_0935 | BRA0268 | BMEI0980 | AGGAGTAAAACCGAAGAT | ribitol dehydrogenase                 | BAB2_0934                  |

Fatty acid and phospholipid metabolism: Biosynthesis/Degradation

|           |         |           |                     |                                                          |                     |
|-----------|---------|-----------|---------------------|----------------------------------------------------------|---------------------|
| BAB1_0484 | BR0459  | BMEI1475  | ATCCTGCATGCCGCTAAC  | acpP                                                     | BAB1_0485-BAB1_0489 |
| BAB1_1994 | BR1994  | BMEI0075  | AACCGCCGTCTTCCCTGAT | 1-acyl-sn-glycerol-3-phosphate acyltransferase, putative | BAB1_1993           |
| BAB1_2173 | BR2172  | BMEI1957  | AACCGCGAAGACGAGGCT  | 3-oxoacyl-(acyl-carrier-protein) synthase I              | BAB1_2172           |
| BAB1_2174 | BR2173  | BMEI1956  | AAGATTGAACGGGCTGTT  | 3-hydroxyl decanoyl dehydratase fabA                     | BAB1_2173-BAB1_2172 |
| BAB2_0668 | BRA0572 | BMEI10695 | ATTTCGCTGCCTGACGGTT | phosphatidylcholine synthase                             | BAB2_0669-BAB2_0673 |
| BAB1_1528 | BR1510  | BMEI0503  | ATGATTAATGAATATCAT  | long-chain acyl-CoA thioester hydrolase, putative        | -                   |
| BAB2_0439 | BRA0799 | BMEI10492 | TTGCGCGATGTAGCTGTT  | acyl-CoA dehydrogenase family protein                    | -                   |

Hypothetical proteins: Conserved and not conserved

|           |        |          |                    |                                |                     |
|-----------|--------|----------|--------------------|--------------------------------|---------------------|
| BAB1_0119 | BR0122 | BMEI1826 | ACGAGTCATAAAACTGAT | hypothetical protein           | BAB1_0120-BAB1_0121 |
| BAB1_0294 | BR0263 | BMEI1658 | AGCTTTCATAATGCTGAT | hypothetical protein           | -                   |
| BAB1_0608 | BR0584 | -        | AGGCGAGATTTGCCTCAT | conserved hypothetical protein | BAB1_0609           |
| BAB1_0651 | BR0628 | BMEI1314 | ATCTGGTTTAACGTGCAT | conserved hypothetical protein | BAB1_0650           |
| BAB1_0939 | BR0922 | BMEI1051 | ATCAGCCATTTTGCGCTG | conserved hypothetical protein | BAB1_0938           |
| BAB1_1058 | BR1038 | BMEI0948 | ATCATATATTTCCCGCAT | hypothetical protein           | -                   |
| BAB1_1295 | BR1276 | BMEI0723 | ATTTGCCCATGCGAGCAT | hypothetical protein           | BAB1_1294-BAB1_1287 |

|           |         |           |                    |                                             |                     |
|-----------|---------|-----------|--------------------|---------------------------------------------|---------------------|
| BAB1_1651 | BR1633  | -         | ATTTGATATATGAAGGAT | hypothetical protein                        | BAB1_1652           |
| BAB1_1678 | BR1664  | -         | AACCCTGATGAAGCAGAT | hypothetical protein                        | BAB1_1677-BAB1_1674 |
| BAB1_1708 | BR1696  | -         | AGCTTCGGTTTCGCGCCT | hypothetical protein                        | BAB1_1707-BAB1_1693 |
| BAB2_0038 | BRA0039 | BMEI10054 | AGGTTCGCACTGCCGGAT | hypothetical protein                        | BAB2_0039-BAB2_0041 |
| BAB2_0801 | BRA0441 | -         | ATGAGCTATCTACCGCTT | conserved hypothetical protein              | -                   |
| BAB2_0892 | BRA0313 | -         | AAATATGAGATAGCCGAT | conserved hypothetical protein              | -                   |
| -         | BR0023  | BMEI1919  | AGTTGCGATTTAGCTCTT | acetoacetyl-COA synthase                    |                     |
| BAB1_0087 | BR0090  | BMEI1857  | ATCATTAACACGCACTT  | hypothetical protein                        | -                   |
| BAB1_0101 | BR0104  | BMEI1844  | ATCTGCGCATTGGCAGAT | conserved hypothetical protein              | -                   |
| BAB1_0155 | BR0156  | BMEI1791  | AACTGCGATATGGGGCGT | hypothetical protein                        | BAB1_0156-BAB1_0157 |
| BAB1_0329 | BR0299  | BMEI1623  | ATCTTCGTTATCCGGAAT | Pollen allergen Poa pIX/Phl pVI, C-terminal | -                   |
| BAB1_0336 | BR0306  | BMEI1616  | GTTTTCTTTATGCCTGTT | 2'-deoxycytidine 5'-triphosphate deaminase  | BAB1_0337-BAB1_0340 |
| BAB1_0339 | BR0309  | BMEI1613  | TTCAGCGATACATCAGAT | conserved hypothetical protein              | BAB1_0340           |
| BAB1_0342 | BR0312  | BMEI1610  | ATTTTCCATTTAGAGCAT | conserved hypothetical protein              | BAB1_0341           |
| BAB1_0343 | BR0313  | BMEI1609  | ATGCTCTAAATGGAAAAT | conserved hypothetical protein              | -                   |
| BAB1_0452 | BR0426  | BMEI1508  | ATTTGCCGCATGGTGGTT | conserved hypothetical protein              | -                   |
| BAB1_0587 | BR0562  | BMEI1371  | ATGCTCTAAAGGTATAAC | conserved hypothetical protein              | -                   |



|           |         |           |                     |                                                    |                     |
|-----------|---------|-----------|---------------------|----------------------------------------------------|---------------------|
| BAB1_0587 | BR0562  | BMEI1371  | ATCTTCTATTTGAAGCAT  | conserved hypothetical protein                     | -                   |
| BAB1_0597 | BR0572  | BMEI1361  | GGTTGCGAGCTTCAGGAT  | conserved hypothetical protein                     | BAB1_0598           |
| BAB1_0598 | BR0573  | BMEI1360  | CTGAGCCATATGGCGGTT  | Amidase                                            | -                   |
| BAB1_0604 | BR0580  | BMEI1354  | ATCCGCTATGCCGACCAT  | conserved hypothetical protein<br>(effector cand.) | -                   |
| BAB1_0812 | BR0792  | BMEI1167  | AAGTGCTTATTGACTGAT  | conserved hypothetical protein                     | BAB1_0811-BAB1_0808 |
| BAB1_0852 | BR0831  | BMEI1132  | ATCATCGATCTGTCGGTC  | hypothetical protein                               | BAB1_0853           |
| BAB1_1529 | BR1511  | BMEI0502  | ATGATATTCATTAATCAT  | conserved hypothetical protein                     | BAB1_1530-BAB1_1533 |
| BAB1_1881 | BR1879  | BMEI0182  | ATGCTCGAAAGAGAAGAT  | hypothetical protein                               | BAB1_1882           |
| BAB2_0056 | BRA0057 | BMEII0037 | AAGACCTATAGAGCGGTT  | hypothetical protein                               | BAB2_0055           |
| BAB2_0163 | BRA0167 | BMEII1075 | TTTAGCAATATCGAGGAT  | conserved hypothetical protein                     | BAB2_0164-BAB2_0165 |
| BAB2_0328 | BRA0907 | -         | AACCGCAAACCGCTGAT   | hypothetical protein                               | BAB2_0327           |
| BAB2_0403 | BRA0833 | BMEII0457 | ATCGGCCTCATCCAACAT  | conserved hypothetical protein                     | -                   |
| BAB2_0616 | BRA0627 | BMEII0649 | GTCAGCGATGTGGCGTAT  | conserved hypothetical protein                     | -                   |
| BAB2_0947 | BRA0256 | BMEII0991 | ATCAGCCAAAGCTGTTTT  | lipase                                             | BAB2_0946-BAB2_0934 |
| BAB2_1069 | BRA1111 | BMEII0188 | ATCAGCCATATCGATAAC  | conserved hypothetical protein                     | BAB2_1071 (BRA1112) |
| BAB2_1131 | BRA1172 | BMEII0123 | AGCCGCCTTTTTTCATCAT | conserved hypothetical protein                     | BAB2_1132-BAB2_1135 |

Protein fate: Degradation/Secretion/Folding

|           |         |           |                    |                                  |                     |
|-----------|---------|-----------|--------------------|----------------------------------|---------------------|
| BAB1_0118 | BR0121  | BMEI1827  | ATCAGTTTTATGACTCGT | hypothetical protein             | BAB1_0117-BAB1_0110 |
| BAB1_2151 | BR2150  | BMEI1979  | ATCCGGCAAATGGCGATC | protease                         | BAB1_2152-BAB1_2171 |
| BAB2_0586 | BRA0654 | BMEI10626 | ATTTGCCTTTTGC GGTT | renal dipeptidase family protein | BAB2_0585-BAB2_0580 |
| BAB1_0901 | BR0882  | BMEI1084  | ATCGGAGATAGCAGGCAT | tatB                             | BAB1_0902-BAB1_0907 |
| BAB1_1162 | BR1139  | BMEI0845  | ATCCCCTGACTGGCTCAT | rotamase family protein          | BAB1_1163-BAB1_1167 |
| BAB2_0782 | BRA0454 | BMEI10812 | TTCTTCTGTTTGAAGCAT | polypeptide deformylase          | -                   |

Protein synthesis

|           |         |           |                     |                                  |                     |
|-----------|---------|-----------|---------------------|----------------------------------|---------------------|
| BAB1_1728 | BR1716  | BMEI0322  | ATCCGCAGGAAAGCGCAT  | ribosomal protein L31            | -                   |
| BAB2_0269 | BRA0966 | BMEI10332 | ATCCGCCAGTTGGCGGCC  | ribosomal protein S21            | -                   |
| BAB1_1183 | BR1161  | BMEI0824  | ATCCGTCATATCCATGAT  | translation elongation factor Ts | BAB1_1182-BAB1_1171 |
| BAB1_1815 | BR1807  | BMEI0242  | GTTTCGCTTATTGCCGCAT | leuS                             | BAB1_1814           |
| BAB1_1815 | BR1807  | BMEI0242  | GATTTCCCTCCTTCAGCAT | leuS                             | BAB1_1814           |

Purines, pyrimidines, nucleosides, and nucleotides

|           |         |           |                    |                                            |   |
|-----------|---------|-----------|--------------------|--------------------------------------------|---|
| BAB2_0326 | BRA0909 | BMEI10387 | AAAAGCGTTTTGGCTGAT | formyltetrahydrofolate deformylase<br>purU | - |
|-----------|---------|-----------|--------------------|--------------------------------------------|---|

|                                               |         |          |                     |                                                    |                     |
|-----------------------------------------------|---------|----------|---------------------|----------------------------------------------------|---------------------|
| BAB2_0587                                     | BRA0653 | BMEI0627 | AACCCGCAAAAGGCAAAT  | adenine deaminase                                  | -                   |
| <u>Regulatory functions: DNA interactions</u> |         |          |                     |                                                    |                     |
| BAB1_1201                                     | BR1179  | BMEI0808 | ATCAGGAAAATAGCGATT  | transcriptional regulator, MerR family             | -                   |
| BAB1_2175                                     | BR2174  | BMEI1955 | AACAGCCCGTTCAATCTT  | regulator ferric uptake                            | BAB1_2176           |
| BAB2_0117                                     | BRA0118 | BMEI1117 | ATCAGCTTTATCAACGGAT | transcriptional regulator, TetR family             | BAB2_0118 (vjbR)    |
| BAB2_0250                                     | BRA0984 | BMEI0312 | GGCTTCCAATTGAATGAT  | transcriptional regulator                          | BAB2_0251           |
| BAB2_0313                                     | BRA0922 | BMEI0375 | ATCAGCGCCCGCGCTCTT  | alanine catabolic operon transcriptional regulator | -                   |
| BAB2_0329                                     | BRA0906 | BMEI0390 | ATCAGCGGTTTTGCGGTT  | transcriptional regulator, LysR family             | BAB2_0330           |
| BAB2_0762                                     | BRA0474 | BMEI0791 | ATCAGCCAGTAGGCTGAT  | ompR response regulator                            | BAB2_0763 (envZ)    |
| BAB2_0780                                     | BRA0456 | BMEI0810 | AGCTTCTGGATCGAGGTT  | bacterial regulatory protein, ArsR family          | BAB2_0779-BAB2_0778 |
| BAB2_1041                                     | BRA1082 | BMEI0219 | AACCGTGAAAAAGAGAAT  | transcriptional regulator, IclR family             | BAB2_1042           |
| BAB2_1099                                     | BRA1140 | BMEI0158 | ATCATTTAGCCCGCTATT  | transcriptional regulator (ftcR)                   | -                   |
| BAB2_1128                                     | BRA1169 | BMEI0127 | ATGCTTCAAATATAGACT  | transcriptional regulator IclR family protein      | BAB2_1127-BAB2_1122 |
| BAB1_1059                                     | BR1039  | BMEI0947 | ATGCGGGAAATATATGAT  | sensory box histidine kinase/response regulator    | BAB1_1060-BAB1_1061 |
| BAB1_1539                                     | BR1522  | BMEI0492 | AACCGCAATGTGGTTCAT  | osmolarity sensor protein EnvZ, putative           | -                   |

Tat (Sec-independent) protein export: has twin-arginine signal sequence

|           |        |          |                    |                       |   |
|-----------|--------|----------|--------------------|-----------------------|---|
| BAB1_0047 | BR0050 | BMEI1893 | AACCATAAGATCGCAAAT | lipoprotein, putative | - |
|-----------|--------|----------|--------------------|-----------------------|---|

Transcription: Transcription factors

|           |        |          |                    |                                        |                     |
|-----------|--------|----------|--------------------|----------------------------------------|---------------------|
| BAB1_0157 | BR0158 | BMEI1789 | ATCTTTTATTTTAGGCAT | RNA polymerase sigma-54 factor         | -                   |
| BAB1_1498 | BR1479 | BMEI0532 | AACAGGAAATCGGCTACT | RNA polymerase sigma-70                | BAB1_1497-BAB1_1495 |
| BAB1_1498 | BR1479 | BMEI0532 | ATGATGAAGTCCGATGCC | RNA polymerase sigma-70                | BAB1_1497-BAB1_1495 |
| BAB1_1665 | BR1650 | BMEI0378 | ATGATGCATATATATGTC | RNA polymerase sigma-70 family protein | -                   |

Transport and binding proteins

|           |         |          |                     |                                                        |                     |
|-----------|---------|----------|---------------------|--------------------------------------------------------|---------------------|
| ?         | BR1954  | ?        | ATCATCCAACGATCACAT  | ABC transporter                                        |                     |
| BAB1_1627 | BR1611  | BMEI0412 | AGGTTCCGGCTAAAGCAT  | ABC transporter                                        | BAB1_1626-BAB1_1624 |
| BAB2_0611 | BRA0632 | -        | ATGCCCCAACCGCTGGT   | bacterial extracellular solute-binding protein         | BAB2_0612-BAB2_0615 |
| BAB2_1040 | BRA1081 | BMEI0220 | ATTCTCTTTTTTACGGTT  | peptide ABC transporter, permease protein              | BAB2_1040-BAB2_1035 |
| BAB2_1129 | BRA1170 | BMEI0126 | AGTCTATATTTGAAGCAT  | Amino acid permease protein                            | BAB2_1130-BAB2_1135 |
| -         | BRA0304 | BMEI0945 | ATCTGATTTTTTACATGTT | sugar ABC transporter                                  | BRA0305-BRA0312     |
| BAB1_0738 | BR0720  | BMEI1233 | ATTTGCCCGTTGACGCTT  | L-lactate permease, lldP                               | BAB1_0737-BAB1_0735 |
| BAB2_0738 | BRA0500 | BMEI0770 | AACATTGAAACATATGAT  | monovalent cation/proton antiporter, MnhA/PhaA subunit | BAB2_0737-BAB2_0726 |

|                                                                 |         |          |                     |                                                            |                     |
|-----------------------------------------------------------------|---------|----------|---------------------|------------------------------------------------------------|---------------------|
| -                                                               | BRA0311 | BMEI0935 | GATTTTCGCCATCGAGGTT | transporter                                                | BRA0312             |
| BAB1_1727                                                       | BR1715  | BMEI0323 | ATGCGCTTTCCTGCGGAT  | ABC transporter, ATP binding/permease protein              | -                   |
| BAB2_0113                                                       | BRA0115 | BMEI1120 | ATGCGCGTTATCGTTGAA  | ABC transporter                                            | BAB2_0112-BAB2_0110 |
| <u>Unknown function: General/Enzymes of unknown specificity</u> |         |          |                     |                                                            |                     |
| BAB1_0739                                                       | BR0721  | BMEI1231 | AAGCGTCAACGGGCAAAT  | oxidoreductase, putative                                   | BAB1_0740           |
| BAB1_1066                                                       | BR1046  | BMEI0940 | AACCGCCTTTTTGCGGTT  | phosphoribosyltransferase family protein                   | BAB1_1065           |
| BAB1_1664                                                       | BR1649  | BMEI0379 | AACCGCTCTTTTGGGAAT  | acetyltransferase, GNAT family                             | -                   |
| BAB2_0097                                                       | BRA0099 | BMEI1134 | GTCCCTCGATCTGGCGGTT | amidase                                                    | BAB2_0096-BAB2_0092 |
| BAB2_0098                                                       | BRA0100 | BMEI1133 | AACCGCCAGATCGAGGAC  | ornithine/DAP/arginine decarboxylase family                | -                   |
| BAB2_0252                                                       | BRA0982 | BMEI0314 | ATTTGCCATTTGAACCAT  | glutamine amidotransferase, class I                        | -                   |
| BAB2_0461                                                       | BRA0777 | BMEI0514 | AACCGCAAATGCACACAT  | oxidoreductase, short-chain dehydrogenase/reductase family | -                   |
| BAB2_0555                                                       | BRA0685 | BMEI0598 | ATCCGCGAAAGCCCTCTT  | phosphatase, Ppx/GppA family                               | BAB2_0554           |
| BAB2_0644                                                       | BRA0596 | BMEI0673 | GACGCCGATAAAGTTGAA  | aminoacyl-tRNA synthetase                                  | BAB2_0645-BAB2_0648 |
| BAB2_1015                                                       | BRA1054 | BMEI0246 | AACCCCATACAGAAGCC   | nitroreductase family protein                              | BAB2_1016           |
| -                                                               | BR0951  | BMEI1023 | ATGCTCTAAATAGAAAAT  | glutathione S-transferase domain protein                   | -                   |
| -                                                               | BRA0301 | BMEI0947 | AAGATCAATATCTCGAAT  | cyclic nucleotide-binding protein                          | -                   |
| BAB1_0882                                                       | BR0863  | BMEI1103 | AAGTTCAATTAAGCAGTT  | TIM-barrel protein, yjbN family                            | -                   |

|           |         |          |                    |                                                                   |                     |
|-----------|---------|----------|--------------------|-------------------------------------------------------------------|---------------------|
| BAB1_1106 | BR1083  | BMEI0899 | ATGACCAAGAGCGCGGAT | BRO family protein: COG3617                                       | BAB1_1105-BAB1_1103 |
| BAB1_1133 | BR1110  | BMEI0873 | ATGCCCGATAGCGATGCG | ATP/GTP-binding site motif A (P-loop)                             | BAB1_1132-BAB1_1129 |
| BAB1_1147 | BR1124  | BMEI0859 | TTCAGCCCCATCGGGGAT | lipoic acid synthetase, lipA                                      | BAB1_1146           |
| BAB1_1718 | BR1706  | BMEI0330 | ATGCCCGAATTCGATCAT | hypothetical protein                                              | BAB1_1717-BAB1_1709 |
| BAB2_0307 | BRA0928 | BMEI0369 | AAGCGAGAAAACGCTCAT | amidohydrolase                                                    | BAB2_0308           |
| BAB2_0361 | BRA0875 | BMEI0419 | AGTTTCGCGCTGCCTCTT | GTP binding protein                                               | BAB2_0362-BAB2_0365 |
| BAB2_0859 | BRA0344 | BMEI0904 | ATGCTTCAAATAGAAGGT | EAL domain protein                                                | -                   |
| BAB2_1072 | BRA1113 | BMEI0186 | AGCATCATTATGGAGCAT | pemK family protein (transcriptional regulator, growth inhibitor) | -                   |
| BAB2_1072 | BRA1113 | BMEI0186 | AGGAGTCATGCCGCTGAT | pemK family protein (transcriptional regulator, growth inhibitor) | -                   |

---

**Supplementary Table 3.** Promoters with a putative *PvirB* box activated by VjbR in *E. coli*.

| ORF       | <i>PvirB</i> box    | Gene name/Predicted function                   | Downstream genes                        |
|-----------|---------------------|------------------------------------------------|-----------------------------------------|
| BAB2_0068 | ATGACCGATATCGCTGAT  | <i>virB1</i>                                   | BAB2_0067-BAB2_0057 <i>virB2-virB12</i> |
| BAB2_0067 | ATCTGCGATCTGGAGCAT  | <i>virB2</i>                                   | BAB2_0066-BAB2_0057 <i>virB3-virB12</i> |
| BAB2_0117 | ATCAGCTTTATCAACGGAT | Transcriptional regulator ( <i>tetR</i> )      | BAB2_0118 <i>vjbR</i>                   |
| BAB2_0762 | ATCAGCCAGTAGGCTGAT  | <i>ompR</i> response regulator                 | BAB2_0763 <i>envZ</i> osmolarity sensor |
| BAB1_1881 | ATGCTCGAAAGAGAAGAT  | Hypothetical protein                           | BAB1_1882 transporter                   |
| BAB2_0328 | AACCGCAAAACCGCTGAT  | Hypothetical protein                           | BAB2_0327 aldehyde dehydrogenase        |
| BAB2_0329 | ATCAGCGGTTTTGCGGTT  | Transcriptional regulator ( <i>lysR12</i> )    | BAB2_0330 oxidoreductase                |
| BAB1_1651 | ATTTGATATATGAAGGAT  | Hypothetical protein                           | BAB1_1652 ( <i>vceA</i> )               |
| BAB1_1066 | AACCGCCTTTTTGCGGTT  | Phosphoribosyl transferase family              | BAB1_1065 <i>mutT</i>                   |
| BAB1_1837 | ATGCGCCATGCCGAACAT  | Carbonic anhydrase, putative                   | -                                       |
| BRA1111   | ATCAGCCATATCGATAAC  | Conserved hypothetical protein ( <i>bopA</i> ) | BRA1112 (BAB2_1071) hypothetical        |
| BAB1_0108 | ATCCGTGATCTCGCAGCT  | Cyclic beta 1-2 glucan synthetase              | BAB1_0109 <i>pncB</i>                   |
| BR0951    | ATGCTCTAAATAGAAAAT  | Glutathione S-transferase domain               | BR0950 oxidoreductase (putative)        |
| BAB2_1106 | ATGCTTAAGGTGGAAATT  | Flagellin family protein ( <i>fliC</i> )       | -                                       |
| BAB1_0604 | ATCCGCTATGCCGACCAT  | hypothetical protein                           | -                                       |
| BAB1_1058 | ATCATATATTTCCCGCAT  | hypothetical protein ( <i>vceC</i> )           | -                                       |
| BAB1_1994 | AACCGCCGTCTTCCTGAT  | 1-acyl-sn-glycerol-3-phosphate acyltransferase | BAB1_1993 inorganic pyrophosphatase     |
| BAB2_0403 | ATCGGCCTCATCCAACAT  | hypothetical protein                           | -                                       |
| consensus | ATCCGCGATATCGCGGAT  |                                                |                                         |

**Supplementary table 4.** Similarity (%) between VceC amino acid sequences of *Brucella* spp. and *O. anthropi*. Amino acid sequences of BR1038, BCAN\_A1051, BSUIS\_A1081, BOV\_1003, BAB1\_1058, BruAb1\_1043, BMEI0948, Oant\_2123, and a predicted ORF from *O. intermedium* were aligned pairwise using ClustalW (MacVector 7.2).

| VceC Identity (%)          | <i>B. suis</i> 1330 | <i>B. canis</i> | <i>B. suis</i> 23445 | <i>B. ovis</i> | <i>B. abortus</i> 2308 | <i>B. abortus</i> 9-941 | <i>B. melitensis</i> 16M | <i>O. anthropi</i> |
|----------------------------|---------------------|-----------------|----------------------|----------------|------------------------|-------------------------|--------------------------|--------------------|
| <i>B. suis</i> 1330        | 100                 |                 |                      |                |                        |                         |                          |                    |
| <i>B. canis</i> ATCC 23365 | 99                  | 100             |                      |                |                        |                         |                          |                    |
| <i>B. suis</i> ATTC 23445  | 88                  | 88              | 100                  |                |                        |                         |                          |                    |
| <i>B. ovis</i>             | 87                  | 87              | 98                   | 100            |                        |                         |                          |                    |
| <i>B. abortus</i> 2308     | 88                  | 88              | 99                   | 98             | 100                    |                         |                          |                    |
| <i>B. abortus</i> 9-941    | 88                  | 88              | 99                   | 98             | 100                    | 100                     |                          |                    |
| <i>B. melitensis</i> 16M   | 75                  | 75              | 85                   | 86             | 85                     | 85                      | 100                      |                    |
| <i>O. anthropi</i>         | 56                  | 55              | 63                   | 61             | 62                     | 62                      | 50                       | 100                |
| <i>O. intermedium</i>      | 56                  | 56              | 62                   | 61             | 62                     | 62                      | 50                       | 81                 |



**Supplementary table 5. Primers used in this study**

| Purpose <sup>a</sup> | Name          | Sequence <sup>b</sup>              |
|----------------------|---------------|------------------------------------|
| pET-vjbR             | VjbR-F        | AAACATATGAGTCTTGATCTCGTTCATTT      |
|                      | VjbR-R        | TCCGTCGACGAGATGCTGTACCTCGGG        |
| pET-gntR4            | GntR4-F       | AAACATATGCGGCTGGTCGCGGAAGGTATC     |
|                      | GntR4-R       | TCCGTCGACGGATCTTGCGGCCTTCATGGC     |
| pET-araC8            | AraC8-F       | AAACATATGTCCGTATTGCTGACAACG        |
|                      | AraC8-R       | TCCGTCGACGCATTCGTAATTTAAGCAATTTG   |
| pET-deoR1            | DeoR1-F       | AAACATATGATACCGGCTGAACGGCAG        |
|                      | DeoR1-R       | TCCGTCGACGATTTTCCCTTCGACTTTGCC     |
| pET-arsR6            | ArsR6-F       | AAACATATGACTAACAAGTTACTTTTTATG     |
|                      | ArsR6Xho-R    | TCCCTCGAGTTGGTGCGCCACCGCCATCAT     |
| pSURS1               | pACYC184-R    | TCCTTCCTGCAGCTGATGTCCGGCGGTGCTTTTG |
|                      | pACYC184-F    | AATTAAGTCGACGCTAGCGGAGTGATACTGGCT  |
| pSURS2               | PVirBBamH1-F  | AAAGGATCCATCGCCATGACAGGCATATTTTC   |
|                      | PVirBEcoR1-R  | TCCGAATTCTAGGATCGTCTCCTTCTCAGAG    |
| pSURS7               | PvjbRBamH1-F  | AAAGGATCCATTCGGGACAATGTGGAGTCC     |
|                      | PvjbREcoR1-R  | TCCGAATTCTGGAAATATCCTTGGTGATGAA    |
| pSURS7b              | PvjbR2BamH1-F | AAAGGATCCGGGGATGTTTTCAATATAGCC     |
|                      | PvjbR2EcoR1-R | TCCGAATTCAAAGCAGGACTCTTAACTTTTTTC  |
| pSURS13R             | 13REcoR1-F    | TCCGAATTCTTTGCTGTTCCATTGCCGT       |
|                      | 13RBamH1-R    | AAAGGATCCGCGAAGTCTGCGCTATTGG       |
| pSURS14              | 14BamH1-F     | AAAGGATCCTGCGATGGGGCACCATCG        |
|                      | 14EcoR1-R     | TCCGAATTCTGGTTCCTCTGGGGTCGCA       |

|          |            |                                    |
|----------|------------|------------------------------------|
| pSURS17F | 17FBamH1-F | AAAGGATCCTGCATTGCCCCCGTTC          |
|          | 17FEcoR1-R | TCCGAATTCGGGATTCTATCTTCTCTTTCGAGC  |
| pSURS18F | 18FBamH1-F | AAAGGATCCTCCATTCTCGCATTAAACATAGTT  |
|          | 18FEcoR1-R | TCCGAATTCGCGAAAATTTCCGTTGAAA       |
| pSURS18R | 18REcoR1-F | TCCGAATTCCTCCATTCTCGCATTAAACATAGTT |
|          | 18RBamH1-R | AAAGGATCCTGCGAAAATTTCCGTTGAAA      |
| pSURS19  | 19BamH1-F  | AAAGGATCCAGCAGAAATTC CAATGTATCTCC  |
|          | 19EcoR1-R  | TCCGAATTCGGATTAATCGGTGTCGCAG       |
| pSURS21  | 21BamH1-F  | AAAGGATCCTATGCCCGGTGATTGAAGG       |
|          | 21EcoR1-R  | TCCGAATTCCTTCATATTGTTTCGAGCGG      |
| pSURS22  | 22BamH1-F  | AAAGGATCCGAAACACGCCGCGCCTA         |
|          | 22EcoR1-R  | TCCGAATTCGGTTATACCTGTGCAATTGAGGA   |
| pSURS23  | 23BamH1-F  | AAAGGATCCAAGCGGTTTTGCGTCGGA        |
|          | 23EcoR1-R  | TCCGAATTCGAAACGCTCCATGGATC         |
| pSURS25  | 25BamH1-F  | AAAGGATCCTCTGGCGCGCTACCTTTC        |
|          | 25EcoR1-R  | TCCGAATTCAGCGTTTGAATATCCCTATCG     |
| pSURS29  | 29BamH1-F  | AAAGGATCCGCTGCGTGTGCTCTTCACC       |
|          | 29EcoR1-R  | TCCGAATTCGTATTGGCGAGGGCCC          |
| pSURS30  | 30BamH1-F  | AAAGGATCCATCTCAACCCCGCCTCTGTC      |
|          | 30EcoR1-R  | TCCGAATTCAGTTTTTTGCCCTTGGGAA       |
| pSURS31  | 31BamH1-F  | AAAGGATCCGTGCTTCTCCGTTTCAGCCG      |
|          | 31EcoR1-R  | TCCGAATTCACGGATGGGCGGATATTAC       |
| pSURS32  | 32BamH1-F  | AAAGGATCCCCTGAACGACAATGTCTCCAA     |
|          | 32EcoR1-R  | TCCGAATTCCTTACATCCTGGGCGTTACG      |

|                   |              |                                                                                         |
|-------------------|--------------|-----------------------------------------------------------------------------------------|
| pSURS35           | 35BamH1-F    | AAAGGATCCGATGCGGGAGATCAGTGAGTT                                                          |
|                   | 35EcoR1-R    | TCCGAATTC <del>CCGGTTCTCCCATGACAGG</del>                                                |
| pFT/GST           | GST-F1       | TCCATATGTCTAGATCCCCTATACTAGGTTATTG                                                      |
|                   | GST-R1       | AACTGCAGTCAACGCGGAACCAGATCCGATTTTG<br>ATCCGGACTCTCTAGACATCCAGAAATTGAAAAAGCCCAA<br>GAGAG |
| pFT/RalF          | RalF-BspE1-F |                                                                                         |
|                   | RalF-Bcl1-R  | ATGATCACTGCAGGCCATTTACCCAGATTTGTG                                                       |
| pFT/RalF(K368A)   | RalF-K368A-R | ACTGCAGATTA <del>AAATTTTAATTGTCTACCTGCTTC</del>                                         |
| pFT/RalF(L372T)   | RalF-L372T-R | ACTGCAGATTA <del>AAATTTTGTGTTGTCTACCTTTTTTC</del>                                       |
| pFT/RalF(350-374) | RalF-F       | CGTCTAGACTGGCACTTAAGGAGGGCGTTC                                                          |
|                   | RalF-R       | GCGCTGCAGGCCATTTACCCAGATTTGTGGAG                                                        |
| pFT/BAB1_1652     | BR1634-F     | TCCTCTAGAAAATCATCATCACGGCAGCA                                                           |
|                   | BR1634-R     | AAACTGCAGCTAGTTCTTGGGCGCGTGGCC                                                          |
| pFT/BAB1_1058     | BAB1_1058-F  | TCCTCTAGAGAACGTTCCAGAGCGTCCAGAA                                                         |
|                   | BAB1_1058-R  | AAACTGCAGCTAATTGCGGGTTTCTCCCTTG                                                         |
| pFT/BR1038        | BR1038-F2    | TCCTCTAGAGAACGTTCCAGAGCGTCCAGAA                                                         |
|                   | BR1038-R     | AAACTGCAGTCAACTCGCCAAGCAGCTTTT                                                          |
| pFT/BAB1_1058-20  | BAB1058-20-R | AAACTGCAGCTAGGTTTCTTCGGCCTTGGC                                                          |
| pFT/BR1038-20     | BR1038-20-R  | AAACTGCAGCTACCGGCTGTTTCATCGGTAGG                                                        |
| pFT/BAB1_1058-49  | BAB1058-49-R | AAACTGCAGCTACA <del>ACTCCTCCATATTTTCATCTTTAC</del>                                      |
| pFT/BAB2_0056     | BRA0057-F    | TCCTCTAGACGTGAAGCTCTGACAAGCGGA                                                          |
|                   | BRA0057-R    | AAACTGCAGCTATTTTCTGGGGGCTTTTCC                                                          |
| pFT/BAB2_0095     | BRA0097-F    | TCCTCTAGACTGGTTTCGCTCTGGCCCAGG                                                          |
|                   | BRA0097-R    | AAACTGCAGTCAGCCAGTCTTTCTTTTCGC                                                          |
| pFT/BAB1_0604     | BAB0604-F    | TCCTCTAGAGCGGTGAGTGTATGCCTACC                                                           |
|                   | BAB0604-R    | AAACTGCAGCTATTTGACCGACCTGATGGG                                                          |

|              |                 |                                    |
|--------------|-----------------|------------------------------------|
| BAB1-0119    | BAB1-0119Xba1-F | TCCTCTAGAGCGACCAATGTTTTTCATGC      |
|              | BAB1-0119PstI-R | AAACTGCAGCTACAATAAAGGAAACCGGCC     |
| BAB1-0651    | BAB1-0651Xba1-F | TCCTCTAGAGAAAATTTTGGATTTGGACGC     |
|              | BAB1-0651PstI-R | AAACTGCAGTCATTTCGTTCTCCCAAATG      |
| BAB1-0740    | BAB1-0740Xba1-F | TCCTCTAGATCGGTGATCGGTGATGTGTT      |
|              | BAB1-0740PstI-R | AAACTGCAGTCAGAATTTGTCTAGCAGGTCCTG  |
| BAB1-1674    | BAB1-1674Xba1-F | TCCTCTAGACTCGCCGCGATTTGCT          |
|              | BAB1-1674PstI-R | AAACTGCAGTTAGCGGTCTTTTTCTTGTCCG    |
| BAB1-1705    | BAB1-1705Xba1-F | TCCTCTAGAGCATCTGTTTCTTCGCAGGAA     |
|              | BAB1-1705PstI-R | AAACTGCAGTCAGCACTTGGCGCGACT        |
| BAB2-0403    | BAB2-0403Xba1-F | TCCTCTAGAAAGATGCGCCGCTTACCTG       |
|              | BAB2-0403PstI-R | AAACTGCAGTCAGTCGAACAGCGGTCCG       |
| ADH17        | VjbR-up-F       | TATCCGCCTCCTGCCTGCCTG              |
|              | VjbR-up-R       | <u>CCCGGGAAGTATCGCTTTGAAAGGAAG</u> |
|              | VjbR-dn-F       | <u>CCCGGGTCAACATGGTCGCGCGGAAAC</u> |
|              | VjbR-dn-R       | <u>CTGCAGGCAGGAATTGCGCATGACCCG</u> |
| ADH58, ADH60 | virB-1F         | <u>CTGCAGGTGGGGCTATGAGGTGAT</u>    |
|              | virB874R        | <u>TCTAGAAGGATCGTCTCCTTCTCA</u>    |
| MDJ30, MDJ31 | vceC-Pst1-F     | AAACTGCAGCTTTCGGTGATGGATGCCG       |
|              | vceCXba1-R      | TCCTCTAGAGGCTGCCTGGATATTTGATGTG    |
| EMSA         | PvirB100-F      | CCCTCACAAGCATATTTGTCC              |
|              | PvirB463-R      | TAGGATCGTCTCCTTCTCAGAG             |
| EMSA         | PvirB1ig2-F     | GACGGCGTAGTTGTTTTCTAA              |
|              | virB1369R       | GCTCAATAAAAGGGAAATGCTCC            |
| EMSA         | RTgyrA-F        | TGATGCCCTCGTGCGTATG                |

RTgyrA-R

TTCCGTGACCTTTTCCAGACG

---

<sup>a</sup> plasmid constructs correspond to those listed in Table 1

<sup>b</sup> underlined nucleotides indicate restriction sites used for cloning the resulting amplicons

```

VceC in:
B. suis 1330      1 MKEWLSGIIGESAANIVGFVLIFAILLGGIFVVLGIIIRRFSGGTFVSSGR 50
B. canis         1 MKEWLSGIIGESAANIVGFVLIFAILLGGIFVVLGIIIRRFSGGTFVSSGR 50
B. suis ATCC 23  1 MKEWLSGIIGESAANIVGFVLIFAILLGGIFVVLGIIIRRFSGGTFVSSGR 50
B. ovis          1 MLSGIIGESATNIVGFVLIFAILLGGIFVVLGIIIRRFSGGTFVSSGR 47
B. melitensis 1  1 0
B. abortus 2308 1 MKEWLSGIIGESAANIVGFVLIFAILLGGIFVVLGIIIRRFSGGTFVSSGR 50
O. anthropi      1 MKEWLSGIIGESAANIVGFILIFAILLGGIFVVLGIIIRRFSGGTFVSNGR 50
O. intermedium   1 MKEWLSGIIGESAANIVGFILIFAILLGGIFVVLGIIIRRFSGGTFVSNGR 50

B. suis 1330      51 MRQPRLSVMDAAAVDSRRKLVLRDDVEHLLLIGGPTDVVVEQNIVLES 100
B. canis         51 MRQPRLSVMDAAAVDSRRKLVLRDDVEHLLLIGGPTDVVVEQNIVLES 100
B. suis ATCC 23  51 MRQPRLSVMDAAAVDSRRKLVLRDDVEHLLLIGGPTDVVVEQNIVLES 100
B. ovis          48 MRQPRLSVMDAAAVDSRRKLVLRDDVEHLLLIGGPTDVVVEQNIVLES 97
B. melitensis 1  1 MMDAAAVDSRRKLVLRDDVEHLLLIGGPTDVVVEQNIVLES 43
B. abortus 2308  51 MRQPRLSVMDAAAVDSRRKLVLRDDVEHLLLIGGPTDVVVEQNIVLES 100
O. anthropi      51 TRQPRLSVMDAAAVDSRRKLVLRDDVEHLLLIGGPTDVVVEQNIVMES 100
O. intermedium   51 TRQPRLSVMDAAAVDSRRKLVLRDDVEHLLLIGGPTDVVVEQNIVMES 100
      *****

B. suis 1330      101 RAGTHAPGTHALGTHAQSSRIEPEHIERFRQHEVLAN-EKTERPALSVQS 149
B. canis         101 RAGTHAPGTHALGTHAQSSRIEPEHIERFRQHEVLAN-EKTERPALSVQS 149
B. suis ATCC 23  101 RAGTHAPGTHALGTHAQSSRIEPEHIERFRQHEVLAN-EKTERPALSVQS 149
B. ovis          98 RAGTHAPGTHALGTHAQSSRIEPEHIERFRQHEVLAN-EKTERPALSVQS 146
B. melitensis 1  44 RAGTHAPGTHALGTHAQSSRIEPEHIERFRQHEVLAN-EKTERPALSVQS 92
B. abortus 2308  101 RAGTHAPGTHALGTHAQSSRIEPEHIERFRQHEVLAN-EKTERPALSVQS 149
O. anthropi      101 RA--HAR-----VQASRIEPEHIERFKQHEATLTNDKAERPALSQT 140
O. intermedium   101 RA--HAR-----VQPSRIEPEHIERFKQHEVLTN---EKTPALSLQT 137
      ** ** * *****.*** . ****.*

B. suis 1330      150 QPGDEREETIQLSSAIAAPVYRKPEPPKAENVRPAPSEPAPMRAP-QPPV 198
B. canis         150 QPGDEREETIQLSSAIAAPVYRKPEPPKAENVRPAPSEPAPMRAP-QPPV 198
B. suis ATCC 23  150 QPGDEREETIQLSSAIAAPVYRKPEPPKAENVRPAPSEPAPMRAP-QPPV 198
B. ovis          147 QPGDEREETIQLSSAIAAPVYRKPEPPKAENVRPAPSEPAPMRAP-QPPV 195
B. melitensis 1  93 QPGDEREETIQLSSAIAAPVYRKPEPPKAENVRPAPSEPAPMRAP-QPPV 141
B. abortus 2308  150 QPGDEREETIQLSSAIAAPVYRKPEPPKAENVRPAPSEPAPMRAP-QPPV 198
O. anthropi      141 PQAEKDEAIQITSAIEAPVYRKPEPAREE---PVQQAAPVVRVPPQAPT 187
O. intermedium   138 PPANEKDEAIQISSAIEETPAYRKPEPAREE---PAPQAATVVRVPPQAPA 184
      *.*.*.*.*.*.* * ***** . * * * . * . * * *

B. suis 1330      199 TPPPA--APRPEAPASQVS-EPHPRPASNYPSQPRTVLPPRPAPSAAPNS 245
B. canis         199 TPPPA--APRPEAPASQVS-EPHPRPASNYPSQPRTVLPPRPAPSAAPNS 245
B. suis ATCC 23  199 TPPPA--APRPEAPASQVS-EPHPRPASNYPSQPRTVLPPRPAPSAAPNS 245
B. ovis          196 TPPPA--APRPEAPASQVS-EPHPRPASNYPSQPRTVLPPRPAPSAAPNS 242
B. melitensis 1  142 TPPPA--APRPEAPASQVS-EPHPRPASNYPSQPRTVLPPRPAPSAAPNS 188
B. abortus 2308  199 TPPPA--APRPEAPASQVS-EPHPRPASNYPSQPRTVLPPRPAPSAAPNS 245
O. anthropi      188 APIPP-RPPVEKSAQPPQPRPAPNYPPQPRTVLPPRPAPSAAPNS 235
O. intermedium   185 VASHSSQSPVEPKAQPMQARQPRPAPNYPPQPRTVLPPRPAPSAAPNS 233
      * * * ***** * * *

B. suis 1330      246 VRAHPAYPLSQVSRGVVSTSNIQ-----AATVATAATANLGSIVPERE 289
B. canis         246 VRAHPAYPLSQVSRGVVSTSNIQ-----AATVATAATANLGSIVPERE 289
B. suis ATCC 23  246 VRAHPAYPLSQVSRGVVSTSNIQ-----AATVATAATANLGSIVPERE 289
B. ovis          243 VRAHPAYPLSQVSRGVVSTSNIQ-----AATVASAATANLGSIVPERE 286
B. melitensis 1  189 VRAHPAYPLSQVSRGVVSTSNIQ-----AATVASAATANLGSIVPERE 232
B. abortus 2308  246 VRAHPAYPLSQVSRGVVSTSNIQ-----AATVASAATANLGSIVPERE 289
O. anthropi      236 TRAHPAYPLSQVSRGVLSTSSGATATAAGVAAAASVASANLGSIVPERE 285
O. intermedium   234 TRAHPAYPLSQVSRGVVSTSSGG-VTATGVAAAATSVASANLGSIVPERE 282
      *****.* ** * . . * .*****

B. suis 1330      290 S-AAPAKP-----AAPAPNQPERSERPERPERPQORIEPVVVF 326
B. canis         290 S-AAPAKP-----AAPAPNQPERSERPERPERPQORIEPVVVF 326
B. suis ATCC 23  290 S-AAPAKP-----AAPAPNQPERSERPERPERPQORIEPVVVF 326
B. ovis          287 S-AAPAKP-----AAPAPNQPERSERPERPERPQORIEPVVVF 323
B. melitensis 1  233 S-AAPAKP-----AAPAPNQPERSERPERPERPQORIEPVVVF 269
B. abortus 2308  290 S-AAPAKP-----AAPAPNQPERSERPERPERPQORIEPVVVF 326
O. anthropi      286 TTVADKSPVDVTGPTVSSSTAAPAFSAS--SE-PER-VEPEIVVAESKPV 331
O. intermedium   283 TTVADKSPVTLDVAGPMVSTTAAPAFSTP--SE-PKR-IEPEIPIAASKPA 328
      . * * * ***** * * * * * .

B. suis 1330      327 VAQEVROPESADDDLDLGGTLHDAIMADLGSN--AGKD-ENMEELARLR 373
B. canis         327 VAQEVROPESADDDLDLGGTLHDAIMADLGSN--AGKD-ENMEELARLR 373
B. suis ATCC 23  327 VAQEVROPESADDDLDLGGTLHDAIMADLGSN--AGKD-ENMEELDTAS 373
B. ovis          324 VAQEVROPESADDDLDLGGTLHDAIMADLGSN--AGKD-ENMEELDTAS 370
B. melitensis 1  270 VAQEVROPESADDDLDLGGTLHDAIMADLGSN--AGKD-ENMEELDTAS 316
B. abortus 2308  327 VAQEVROPESADDDLDLGGTLHDAIMADLGSN--AGKD-ENMEELDTAS 373
O. anthropi      332 ETEAVA-VETPSDNLADLGGALHEAIAADVNSESAASADAKDAISFDTEF 380
O. intermedium   329 VSEPVS-PEPPGDDLADLGNALQDAITADINSQSASASESKEAASFDFTEF 377
      .. * * * * **..*.* * * * .

B. suis 1330      374 WKTNY SARLIFHLPMNSRKMMPRPKPKSKTKWKSCLAS 410
B. canis         374 WKTNY SARLIFHLPMNSRKMMPRPKPKSKTKWKSCLAS 410
B. suis ATCC 23  374 LEDELLSSLDISPTDEQPEDAKAEETIEDEMEKLLGELTKGETRN 418
B. ovis          371 LEDELLSSLDISPTDEQPEDAKAEETIEDEMEKLLGELTKGETRN 415
B. melitensis 1  317 LEDELLSSLDISPTDEQPEDAKAEETIEDEMEKLLGELTKGETRN 361
B. abortus 2308  374 LEDELLSSLDISPTDEQPEDAKAEETIEDEMEKLLGELTKGETRN 418
O. anthropi      381 FENELSSLDISATDDVVED-KAKDDIEDEMEKLLGELTKDEIRRS 425
O. intermedium   378 FENELLRSLDISATDDTLED-KTKDDIEDEMEKLLGELTKDGIRRD* 423
      * * * * *

```

**Supplementary Figure 1.** Multiple alignment of VceC amino acid sequences of *Brucella* species and *Ochrobactrum* species *anthropi* and *intermedium* using ClustalW (MacVector 7.2). Proteins aligned are BR1038, BCAN\_A1051, BSUIS\_A1081, BOV\_1003, BMEI0948, BAB1\_1058 and Oant\_2123, and a predicted ORF from the *O. intermedium* genome (Brettin, Tsolis et al, unpublished results).
